# Supplementary material for: Synthesis of surface-functionalized t-Se microspheres via a green wet-chemical route
Source: Royal Society of Chemistry journal article supplement (doi:10.1039/b514605d), 2005-12-12
Supplement: b514605d.pdf [file b514605d.pdf]

**Synthesis of surface-functionalized t-Se microspheres *via* a  
green wet-chemical route**

**Xianluo Hu,<sup>a</sup> Jimmy C. Yu,<sup>\*a</sup> and Quan Li<sup>b</sup>**

<sup>a</sup> *Department of Chemistry and Environmental Science Programme, The Chinese University of Hong Kong, Shatin, New Territories, Hong Kong, P. R. China.*

*E-mail: jimyu@cuhk.edu.hk; Fax: +852 2603 5057; Tel: +852 2609 6268*

<sup>b</sup> *Department of Physics, The Chinese University of Hong Kong, Shatin, New Territories, Hong Kong, P. R. China.*

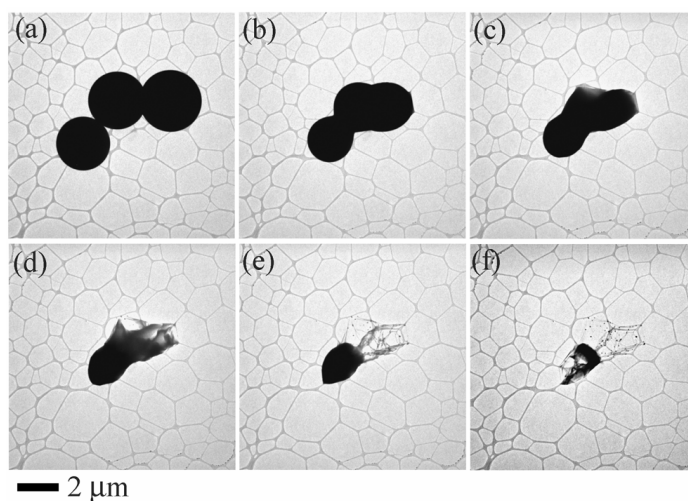

**Figure S1.** TEM images showing the typical morphology evolution of the Se microspheres irradiated under the electron beam. The whole exposure time is less than ~10 s.

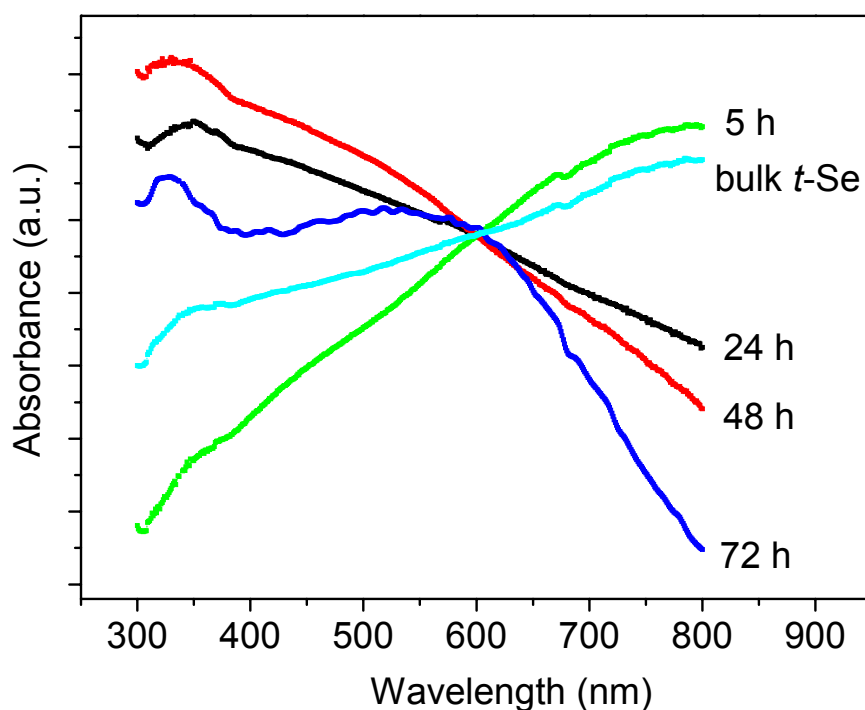

**Figure S2.** UV-vis absorbance spectra for the bulk *t*-Se powder and the as-synthesized Se particles at 150 °C for 5 h, 24 h, 48 h, and 72 h. The colloidal dispersion (in deionized water) was placed in a quartz cuvette and the cuvette was gently shaken before each spectrum was taken. All the spectra have been adjusted to fit an isobestic point at 600 nm.
